# Supplementary material
Source: PubMed Central journal article supplement (PMC2783001)
Supplement: bgp198_1.pdf [file bgp198_1.pdf]

| <b>Supplemental Table I - Ras Upregulates ELR+ CXC chemokines (pg/mg protein)</b> |                  |               |               |               |               |               |
|-----------------------------------------------------------------------------------|------------------|---------------|---------------|---------------|---------------|---------------|
|                                                                                   | <b>CXCL1,2,3</b> | <b>CXCL-1</b> | <b>CXCL-5</b> | <b>CXCL-6</b> | <b>CXCL-7</b> | <b>CXCL-8</b> |
| <b>HEK-HT</b>                                                                     | 1429.36          | 16414.35      | 1209.47       | 291.66        | 394.78        | 2726.15       |
| <b>HEK-HT<sup>G12V</sup></b>                                                      | 71117.57         | 98631.35      | 11730.44      | 1431.81       | 1376.77       | 42053.42      |
| <b>HSMM-HT</b>                                                                    | 28.27            | 16438.41      | 44.21         | 0             | 151.95        | 1225.27       |
| <b>HSMM-HT<sup>G12V</sup></b>                                                     | 63189.98         | 44053.25      | 75397.25      | 1555.55       | 1772.29       | 55632.29      |
| <b>BJ-HT</b>                                                                      | 51104.51         | 95420.92      | 686.44        | 1053.41       | 2149.55       | 20868.02      |
| <b>BJ-HT<sup>G12V</sup></b>                                                       | 299308.39        | 391406.39     | 36346.22      | 2128.75       | 3162.47       | 144181.76     |

**Supplemental Table I.** Antibody array demonstrating increased secretion of ELR+ CXC chemokines in HEK-HT, BJ-HT and HSMM-HT cells expressing HRas<sup>G12V</sup> compared to a vector control. Absolute values for CXCL1,2,3; CXCL1, CXCL5, CXCL6, CXCL7, and CXCL8 levels from the above cell lines is shown as pg of secreted protein per mg of total cell lysate.
